# Supplementary material
Source: PubMed Central journal article supplement (PMC6277170)
Supplement: 10.1194_M087106_jlr.M087106-1.pdf [file 10.1194_M087106_jlr.M087106-1.pdf]

# The preferential arrangement of lipids in the long periodicity phase stratum corneum matrix model

C.M. Beddoes<sup>1</sup>, G.S. Gooris<sup>1</sup>, J.A. Bouwstra<sup>1\*</sup>

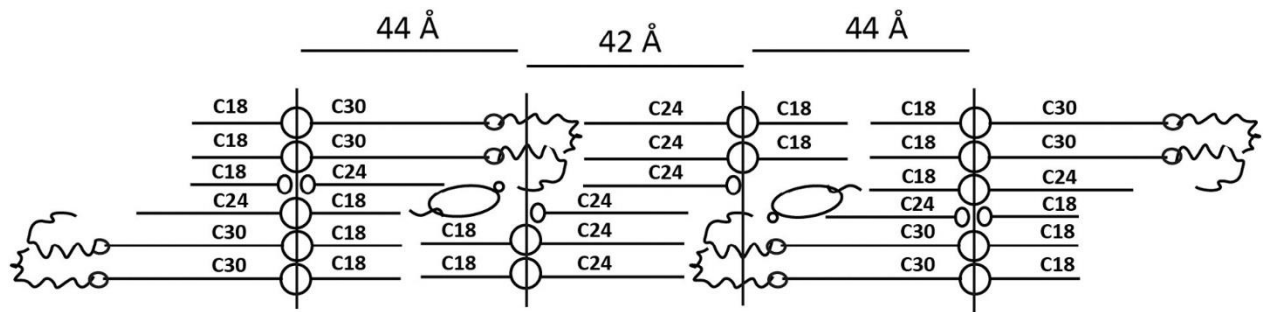

**Supplemental Figure S1** The proposed molecular model of the LPP unit cell. Reprinted from [25], with permission from Elsevier.
