# Supplementary material
Source: PubMed Central journal article supplement (PMC6277170)
Supplement: 10.1194_M087106_jlr.M087106-3.pdf [file 10.1194_M087106_jlr.M087106-3.pdf]

# The preferential arrangement of lipids in the long periodicity phase stratum corneum matrix model

C.M. Beddoes<sup>1</sup>, G.S. Gooris<sup>1</sup>, J.A. Bouwstra<sup>1\*</sup>

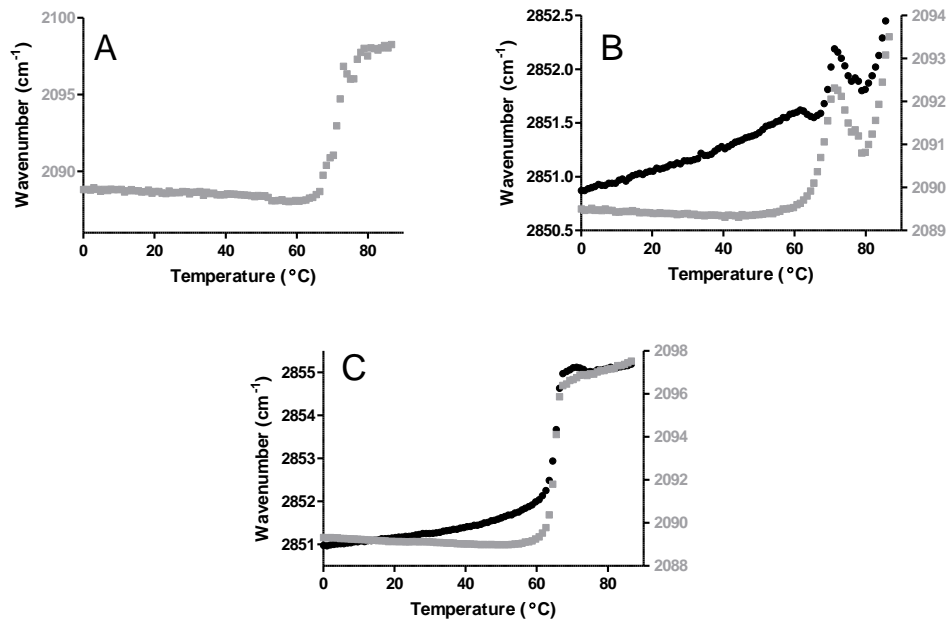

**Supplemental Figure S3**  $\nu$  curves of (A) dFFA, (B) LB-dNS/dC24 and (C) LB-dNS/dFFA. CD<sub>2</sub> curves (■) and CH<sub>2</sub> curves (●) show transition from ordered to disordered phase at the same temperature for each sample.
